# Supplementary material for: Effect of elevated temperature on membrane lipid saturation in Antarctic notothenioid fish
Source: PeerJ. 2018 May 18;6:e4765. doi: 10.7717/peerj.4765 (PMC5961637; doi:10.7717/peerj.4765)
Supplement: Supplemental Information 1 — Each work sheet includes raw data of the respective figure or table mentioned in the file name. [file peerj-06-4765-s001.xlsx]

## Sheet: PCA raw data_Figure 1
	C16:0	C18:0	C16:1n7	C18:1n9	C18:1n7	C20:1n9	C20:1	C2:4n6	C20:5n3	C22:6n3
CH07	20.808	3.03246	2.97656	11.2369	5.95453	7.92493	1.68812	4.19234	18.8642	21.6591
CH08	18.5441	4.5864	3.13668	15.8229	7.97891	3.86076	0	5.53531	18.1146	22.4203
CH09	20	2.98362	2.03	7.77	9	5.33603	0	5.15549	22	17
CH06	21.865	1.94481	5.30419	8.17154	8.16323	3.68019	1.78191	5.62001	20.758	22.7111
SPOT 6	20.9738	11.1445	0	15.5137	2.21229	0	0	10.1823	12.5317	25.7375
SPOT 2	18.5649	10.5043	0	8.56742	3.51985	0	0	9.49199	15.0493	32.4517
SPOT 3	20.2405	13.2337	1.93695	11.9441	2.65713	0	0	8.82158	12.8762	26.2073
SPOT 1	20.406	15.6773	0	8.24214	4.47866	0	0	7.81616	15.5346	27.8451
PB1	10.9323	3.38785	3.97421	11.1669	9.64235	2.69725	2.48877	3.43997	18.7374	26.1255
PB2	14.1114	5.44897	3.31356	7.45183	8.65944	3.0632	6.30313	2.63612	25.0653	21.4719
PB3	14.4353	3.64121	4.7494	10.3048	11.2115	2.59058	0	3.31019	23.747	23.0101
TB1	13.8765	4.4656	5.01926	7.29026	7.81688	4.21752	2.92745	4.35163	22.0574	24.9496
TB2	12.9223	4.98916	4.77981	7.75436	9.01099	4.10953	5.88253	5.15409	20.2865	25.1107
TB3	11.6569	4.74982	4.18894	7.96488	9.43986	3.58673	5.41908	4.10655	19.3112	26.4197
TB4	13.8588	5.85151	5.88598	6.66178	10.1698	2.55179	2.74244	5.54354	16.8653	25.5179
											p

## Sheet: PCA analysis data_Figure 1
													Comp. Scores	CH07	CH08	CH09	CH06	SPOT 6	SPOT 2	SPOT 3	SPOT 1	PB1	PB2	PB3	TB1	TB2	TB3	TB4
													Axis 1	-0.891614	0.441244	-1.21319	-0.969701	4.38824	3.54448	3.57654	3.43648	-1.4702	-2.46946	-2.01825	-1.81547	-1.85388	-1.63162	-1.0536
													Axis 2	-2.07684	-1.97122	-2.26973	-0.984959	-0.776701	1.2831	0.0991364	0.917571	0.714119	0.605383	-0.3154	0.702422	1.31742	1.39922	1.35649
													Axis 3	-0.243277	1.44345	-1.25058	-0.748177	0.778912	-0.420135	0.180036	-1.26719	1.4934	-1.12201	0.635315	-0.233552	0.0939035	0.280725	0.379179
													Axis 4	-1.37504	0.0960354	0.765225	-0.418563	-0.370227	0.207824	-0.126665	0.634247	0.566082	0.162792	1.67148	-0.0111352	-0.945313	-0.601938	-0.25481
													Axis 5	0.0465996	-0.238075	-0.041548	1.17226	-0.72464	0.410044	0.127879	-0.0972951	-0.223913	-1.50907	0.301176	0.311654	-0.276431	-0.385681	1.12704
													Axis 6	0.996205	-0.177799	-0.111626	-0.482393	-0.413141	0.855184	-0.663021	0.268881	0.582286	-0.416994	0.0408008	0.212773	-0.408912	0.290487	-0.572731
													Axis 7	-0.223209	0.0141055	-0.499901	0.749757	0.318725	0.498286	-0.350193	-0.41916	-0.0553551	0.328084	0.192745	0.215844	-0.00334645	-0.241234	-0.525148
													Axis 8	-0.352212	-0.017278	0.613569	0.0356364	0.165979	0.431204	-0.345316	-0.363689	0.246119	-0.0678744	-0.42267	-0.348603	0.0469102	0.182736	0.195487
													Axis 9	-0.00261263	0.390511	-0.157919	0.0527669	-0.169033	0.0866434	-0.30418	0.273146	-0.204693	0.0449693	0.0743202	-0.39245	0.175243	0.031527	0.10176
													Axis 10	0.0375702	-0.0632058	-0.0890231	0.207246	-0.08303	-0.0889939	0.104382	0.0702237	0.255559	0.117404	-0.0901857	-0.232425	-0.188455	0.0397471	0.00318593
														1	2	3	4	5	6	7	8	9	10
													C16:0	0.256037	-0.482308	-0.39161	-0.201697	0.302962	-0.0919148	0.290384	-0.124947	0.352585	0.428134
													C18:0	0.361989	0.242544	-0.176337	0.134945	-0.172184	-0.123855	-0.478597	-0.559443	0.400875	-0.114507
													C16:1n7	-0.339834	0.113278	0.286071	-0.146795	0.5641	-0.456143	0.0232324	-0.47433	-0.126142	-0.0240559
													C18:1n9	0.205333	-0.37946	0.741688	-0.0638682	-0.360542	-0.081476	0.212012	-0.167365	0.220448	-0.0384937
													C18:1n7	-0.380188	0.0546297	0.173455	0.333169	0.164596	-0.111343	-0.17927	0.392272	0.683367	0.137438
													C20:1n9	-0.311364	-0.348435	-0.0286471	-0.478497	0.115036	0.473607	-0.334239	-0.0951038	0.191243	-0.396225
													C20:1	-0.26533	0.364035	-0.135907	-0.630491	-0.456582	-0.277843	0.164901	0.0592765	0.210319	0.143124
													C2:4n6	0.388144	0.0133344	-0.0630486	-0.166074	0.2201	-0.404596	0.101198	0.394289	0.12414	-0.651424
													C20:5n3	-0.360029	-0.0883573	-0.300248	0.372469	-0.198361	0.0132614	0.547504	-0.300455	0.152921	-0.425145
													C22:6n3	0.2315	0.535567	0.200269	-0.108104	0.306241	0.532667	0.400106	-0.0789845	0.252744	-0.00777494
														Eigenvalues	Cumulative Total	% of Total Variance	Cum. % of Total Variance
													1	5.90436	5.90436	59.0436	59.0436
													2	1.74464	7.649	17.4464	76.49
													3	0.776186	8.42519	7.76186	84.2519
													4	0.551506	8.9767	5.51506	89.7669
													5	0.44032	9.41702	4.4032	94.1701
													6	0.273044	9.69006	2.73044	96.9006
													7	0.145621	9.83568	1.45621	98.3568
													8	0.100447	9.93613	1.00447	99.3612
													9	0.0449262	9.98105	0.449262	99.8105
													10	0.0189486	10	0.189486	100
		CH	NC	PB	TB	vect
CH07	-0.891614	-2.07684
CH08	0.441244	-1.97122
CH09	-1.21319	-2.26973
CH06	-0.969701	-0.984959
SPOT 6	4.38824		-0.776701
SPOT 2	3.54448		1.2831
SPOT 3	3.57654		0.0991364
SPOT 1	3.43648		0.917571
PB1	-1.4702			0.714119
PB2	-2.46946			0.605383
PB3	-2.01825			-0.3154
TB1	-1.81547				0.702422
TB2	-1.85388				1.31742
TB3	-1.63162				1.39922
TB4	-1.0536				1.35649
C16:0	1.28019					-2.41154
C18:0	1.80994					1.21272
C16:1n7	-1.69917					0.56639
C18:1n9	1.02666					-1.8973
C18:1n7	-1.90094					0.273149
C20:1n9	-1.55682					-1.74218
C20:1	-1.32665					1.82017
C2:4n6	1.94072					0.066672
C20:5n3	-1.80014					-0.441786
C22:6n3	1.1575					2.67783
	0.256037					-0.482308
	0.361989					0.242544
	-0.339834					0.113278
	0.205333					-0.37946
	-0.380188					0.0546297
	-0.311364					-0.348435
	-0.26533					0.364035
	0.388144					0.0133344
	-0.360029					-0.0883573
	0.2315					0.535567
CH: C.hamatus
SPOT : NC: Notolabrus celidotus
PB: Pagothenia borchgrevinki
TB : Trematomus bernacchii

## Sheet:  FA_all spcs_Table 2_DSI_Fig 7
Species	C16:0	C18:0	SFA	C16:1n7	C16:1	C18:1n9	C18:1n9	C20:1n9	C20:1	MUFA	C18:2n6	C20:4n6	C20:5n3	C22:5n3	C22:6n3	PUFA	C16:1n7/C16:0	C18:1n9/C18:0
CH07	20.808	3.0325	23.8405	2.97656	0	11.2369	5.9545	7.92493	1.68812	29.781	1.66296	4.1923	18.8642	*	21.6591	46.3785	0.143049	3.70549
CH08	18.5441	4.5864	23.1305	3.13668	0	15.8229	7.9789	3.86076	0	30.7992	1.84045	5.5353	18.1146	*	22.4203	46.0702	0.169147	3.44996
CH09	20.4965	2.6171	23.1136	1.78484	0	6.8191	8.6468	4.6806	0	21.9313	1.17283	4.5222	21.5919	*	16.5577	42.6719	0.0870802	2.60559
CH06	21.865	1.9448	23.8098	5.30419	0	8.1715	8.1632	3.68019	1.78191	27.101	0	5.62	20.758	*	22.7111	49.0891	0.242588	4.20172
SPOT 6	20.9738	11.1445	32.1183	0	0	15.5137	2.2123	0	0	17.726	2.49194	10.1823	12.5317	1.70421	25.7375	50.1557	0	1.39205
SPOT 2	18.5649	10.5043	29.0692	0	0	8.5674	3.5199	0	0	12.0873	0	9.492	15.0493	1.85054	32.4517	58.8435	0	0.815609
SPOT 3	20.2405	13.2337	33.4742	1.93695	0	11.9441	2.6571	0	0	16.5382	0	8.8216	12.8762	2.08255	26.2073	49.9877	0.0956967	0.902552
SPOT 1	20.406	15.6773	36.0833	0	0	8.2421	4.4787	0	0	12.7208	0	7.8162	15.5346	0	27.8451	51.1959	0	0.525735
PB1	10.9323	3.3879	14.3202	3.97421	0	11.1669	9.6423	2.69725	2.48877	29.9694	0	3.44	18.7374	0	26.1255	52.1672	0.363529	3.29611
PB2	14.1114	5.449	19.5604	3.31356	0	7.4518	8.6594	3.0632	6.30313	28.7911	0	2.6361	25.0653	0	21.4719	50.4213	0.234814	1.36755
PB3	14.4353	3.6412	18.0765	4.7494	0	10.3048	11.2115	2.59058	0	28.8563	0	3.3102	23.747	0	23.0101	51.6158	0.329013	2.83006
TB1	13.8765	4.4656	18.3421	5.01926	3.02801	7.2903	7.8169	4.21752	2.92745	30.2994	0	4.3516	22.0574	0	24.9496	51.3586	0.361709	1.63255
TB2	12.9223	4.9892	17.9115	4.77981	0	7.7544	9.011	4.10953	5.88253	31.5373	0	5.1541	20.2865	0	25.1107	50.5513	0.369888	1.55424
TB3	11.6569	4.7498	16.4067	4.18894	3.15645	7.9649	9.4399	3.58673	5.41908	33.756	0	4.1065	19.3112	0	26.4197	49.8374	0.359353	1.67689
TB4	13.8588	5.8515	19.7103	5.88598	4.35124	6.6618	10.1698	2.55179	2.74244	32.3631	0	5.5435	16.8653	0	25.5179	47.9267	0.424711	1.13848
CH: C.hamatus
SPOT : NC: Notolabrus celidotus
PB: Pagothenia borchgrevinki
TB : Trematomus bernacchii

## Sheet:  Cholestrol_species_Figure 2
C	cholestrol
CH07	0.127526
CH08	0.181214
CH09	0.171752
CH06	0.150049
SPOT 6	0.127494
SPOT 2	0.123684
SPOT 3	0.0916494
SPOT 1	0.145369
PB1	0.104365
PB2	0.107873
PB3	0.134215
PB4	0.0864387
TB1	0.159505
TB2	0.193229
TB3	0.207343
TB4	0.127597
CH: C.hamatus
SPOT : NC: Notolabrus celidotus
PB: Pagothenia borchgrevinki
TB : Trematomus bernacchii

## Sheet: TB_T4 _Table 3
Days	temp	C16:0	C18:0	SFA	C16:1n7	C16:1	C18:1n9	C18:1n7	C20:1n9	C20:1	MUFA	C20:4n6	C20:5n3	C22:6n3	PUFA	C16:1n7/C16:0	C18:1n9/C18:0
D14	deg0	14.5517	5.60805	20.1598	3.2706	3.97775	5.92243	8.44167	3.7526	0	25.365	6.67128	26.289	21.5149	54.4752	0.224756	1.05606
D14	deg0	18.1442	6.88707	25.0313	6.51646	0	6.09289	8.09671	2.45526	4.61712	27.7784	3.44353	22.5606	21.1862	47.1903	0.359149	0.884686
D14	deg0	15.7382	7.02134	22.7595	4.6749	3.34072	5.79341	8.45753	2.93221	3.09178	28.2905	3.78993	22.0215	23.1385	48.9499	0.297042	0.825114
D14	deg0	15.6112	6.42263	22.0338	3.19959	2.46123	4.92245	9.18858	3.12537	0	22.8972	5.09435	26.0968	23.8778	55.069	0.204955	0.766423
D14	deg4	13.616	6.83638	20.4524	2.92177	2.84915	7.15351	8.67	3.0636	4.55286	29.2109	4.21246	19.4879	26.6363	50.3367	0.214583	1.04639
D14	deg4	13.8281	8.31923	22.1473	2.97815	2.39202	6.71607	9.48924	3.45353	2.29303	27.322	4.18059	18.582	27.7681	50.5306	0.215369	0.807294
D14	deg4	15.8945	6.9753	22.8698	4.37794	2.6186	3.39617	6.99817	2.51568	4.47595	24.3825	5.61945	17.3647	29.7635	52.7476	0.275437	0.486885
D14	deg4	13.8776	8.70493	22.5826	2.09864	2.84351	6.65536	10.9744	4.00515	0	26.5771	4.71456	20.7647	25.3611	50.8403	0.151225	0.76455

## Sheet: PB_T4 _Table 3
Days	temp	C16:0	C18:0	SFA	C16:1n7	C16:1	C18:1n9	C18:1n7	C20:1n9	C20:1	MUFA	C20:4n6	C20:5n3	C22:6n3	PUFA	C16:1n7/C16:0	C18:1n9/C18:0
D28	deg0	15.0956	7.19267	22.2882	3.39618	0	10.3306	10.2144	2.55682	0	26.4979	2.81508	20.6999	27.6989	51.2138	0.224979	1.43627
D28	deg0	10.7543	5.17424	15.9285	2.90163	0	8.10631	8.25849	2.23202	2.87538	24.3738	2.33348	18.262	23.3348	43.9303	0.269811	1.56667
D28	deg0	15.0346	5.86898	20.9036	3.65875	0	10.5017	10.3769	2.0479	0	26.5853	2.5374	19.992	29.9818	52.5112	0.243355	1.78936
D28	deg0	14.2562	3.08347	17.3397	4.69617	1.72881	11.276	9.14721	1.58689	0	28.435	2.55451	14.6562	37.0146	54.2253	0.329412	3.6569
D28	deg4	15.1549	4.87176	20.0267	2.59328	2.78815	10.3431	8.79915	2.71469	1.93371	29.1721	4.2122	23.2795	23.3095	50.8012	0.171118	2.12308
D28	deg4	13.7279	4.32349	18.0514	4.52862	2.87181	11.5346	10.1776	1.94084	2.75296	33.8064	3.36096	17.5307	27.2506	48.1423	0.329885	2.66788
D28	deg4	14.1678	3.15579	17.3236	4.84687	0	11.3582	9.29427	1.66445	0	27.1638	2.55659	14.9667	37.9893	55.5126	0.342105	3.59916
D28	deg4	13.6705	4.43157	18.1021	4.71344	1.56593	11.8227	10.476	1.87911	0	30.4573	3.83652	14.7667	32.8375	51.4407	0.344788	2.66784

## Sheet: TB_PB_Cholestrol_ Figure 3
TB_Cholestrol_14 days acclimation				PB_Cholestrol_28 days acclimation
temp	days	CHOL		temp	days	CHOL
degree0	D14	0.114793		degree0	D28	0.114793
degree0	D14	0.16163		degree0	D28	0.16163
degree0	D14	0.079476		degree0	D28	0.079476
degree0	D14	0.19011		degree0	D28	0.19011
degree4	D14	0.122385		degree4	D28	0.122385
degree4	D14	0.108881		degree4	D28	0.108881
degree4	D14	0.165192		degree4	D28	0.165192
degree4	D14	0.123833		degree4	D28	0.123833

## Sheet: TB_osmolality_Figure 4
Fish (TB) (Biological replicates	Temp	Days	Osmolality
1	Deg 0	D1	571
2	Deg 0	D1	594
3	Deg 0	D1	571
4	Deg 0	D1	569
1	Deg 0	D2	539
2	Deg 0	D2	562
3	Deg 0	D2	570
4	Deg 0	D2	557
5	Deg 0	D2	569
1	Deg 0	D3	568
2	Deg 0	D3	552
3	Deg 0	D3	559
4	Deg 0	D3	497
5	Deg 0	D3	529
1	Deg 0	D7	580
2	Deg 0	D7	597
3	Deg 0	D7	567
1	Deg 0	D14	564
2	Deg 0	D14	606
3	Deg 0	D14	624
4	Deg 0	D14	614
1	Deg 4	D1	565
2	Deg 4	D1	615
3	Deg 4	D1	581
1	Deg 4	D2	579
2	Deg 4	D2	562
3	Deg 4	D2	587
4	Deg 4	D2	555
5	Deg 4	D2	572
1	Deg 4	D3	544
2	Deg 4	D3	533
3	Deg 4	D3	554
4	Deg 4	D3	564
1	Deg 4	D7	542
2	Deg 4	D7	555
3	Deg 4	D7	507
4	Deg 4	D7	537
1	Deg 4	D14	579
2	Deg 4	D14	562
3	Deg 4	D14	545
4	Deg 4	D14	536

## Sheet: PB_osmolality_Figure 4
Fish (PB) (Biological replicates	Temperature	Time (day)	Osmolality
1	0	1	606
2	0	1	593
3	0	1	586
4	0	1	608
1	0	2	606
2	0	2	594
3	0	2	625
4	0	2	596
1	0	3	582
2	0	3	603
3	0	3	621
4	0	3	588
1	0	7	605
2	0	7	575
3	0	7	596
4	0	7	614
1	0	28	575
2	0	28	578
3	0	28	588
4	0	28	592
1	4	1	607
2	4	1	602
3	4	1	592
4	4	1	602
1	4	2	680
2	4	2	583
3	4	2	662
4	4	2	590
1	4	3	581
2	4	3	575
3	4	3	570
4	4	3	567
1	4	7	520
2	4	7	437
3	4	7	582
1	4	28	523
2	4	28	546
3	4	28	533
4	4	28	533

## Sheet: TB_D7_T6_Figure 5_DSI_Figure 8
temp	C16:0	C18:0	SFA	C16:1n7	C18:1n9	C18:1n7	C20:1n9	C20:1	MUFA	C20:4n6	C20:5n3	C22:6n3	PUFA	C16:1n7/C16:0	C18:1n9/C18:0
deg0	12.9688	4.49677	17.4656	5.26347	7.16027	7.9831	4.31064	7.97719	32.6947	3.86746	23.1339	22.8384	49.8397	0.405855	1.59231
deg0	12.92	6.3314	19.2514	5.97551	6.46001	10.1835	3.91787	3.45132	29.9882	3.42141	21.3689	25.9701	50.7604	0.4625	1.02031
deg0	14.5009	5.90042	20.4013	5.15782	5.75471	10.4912	3.61645	2.70356	27.7237	4.54689	21.3125	26.0156	51.8749	0.35569	0.975305
deg0	14.4414	4.39083	18.8322	4.96684	7.33176	9.02852	3.48732	4.39741	29.2119	5.1347	21.3452	25.476	51.956	0.343932	1.66979
deg6	15.3339	8.85354	24.1874	4.41674	5.09888	9.12439	3.03812	2.76584	24.444	4.93121	17.7515	28.6859	51.3686	0.288037	0.575915
deg6	15.8572	8.78854	24.6458	4.19704	6.67108	8.20632	3.19038	2.19319	24.458	5.12323	18.8867	26.8863	50.8962	0.264677	0.759066
deg6	18.2662	7.08229	25.3485	5.01394	5.89508	9.0902	3.32768	2.7526	26.0795	4.77611	20.3462	29.183	54.3053	0.274493	0.83237

[truncated: 1 more sheets: PB_D7_T6_Figure 6_DSI_Figure 8]
